# Supplementary figures and images for: The absolute photoionization cross section of the mercapto radical (SH) from threshold up to 15.0 eV
Source: Royal Society of Chemistry journal article supplement (doi:10.1039/c9cp05809e), 2019-01-01

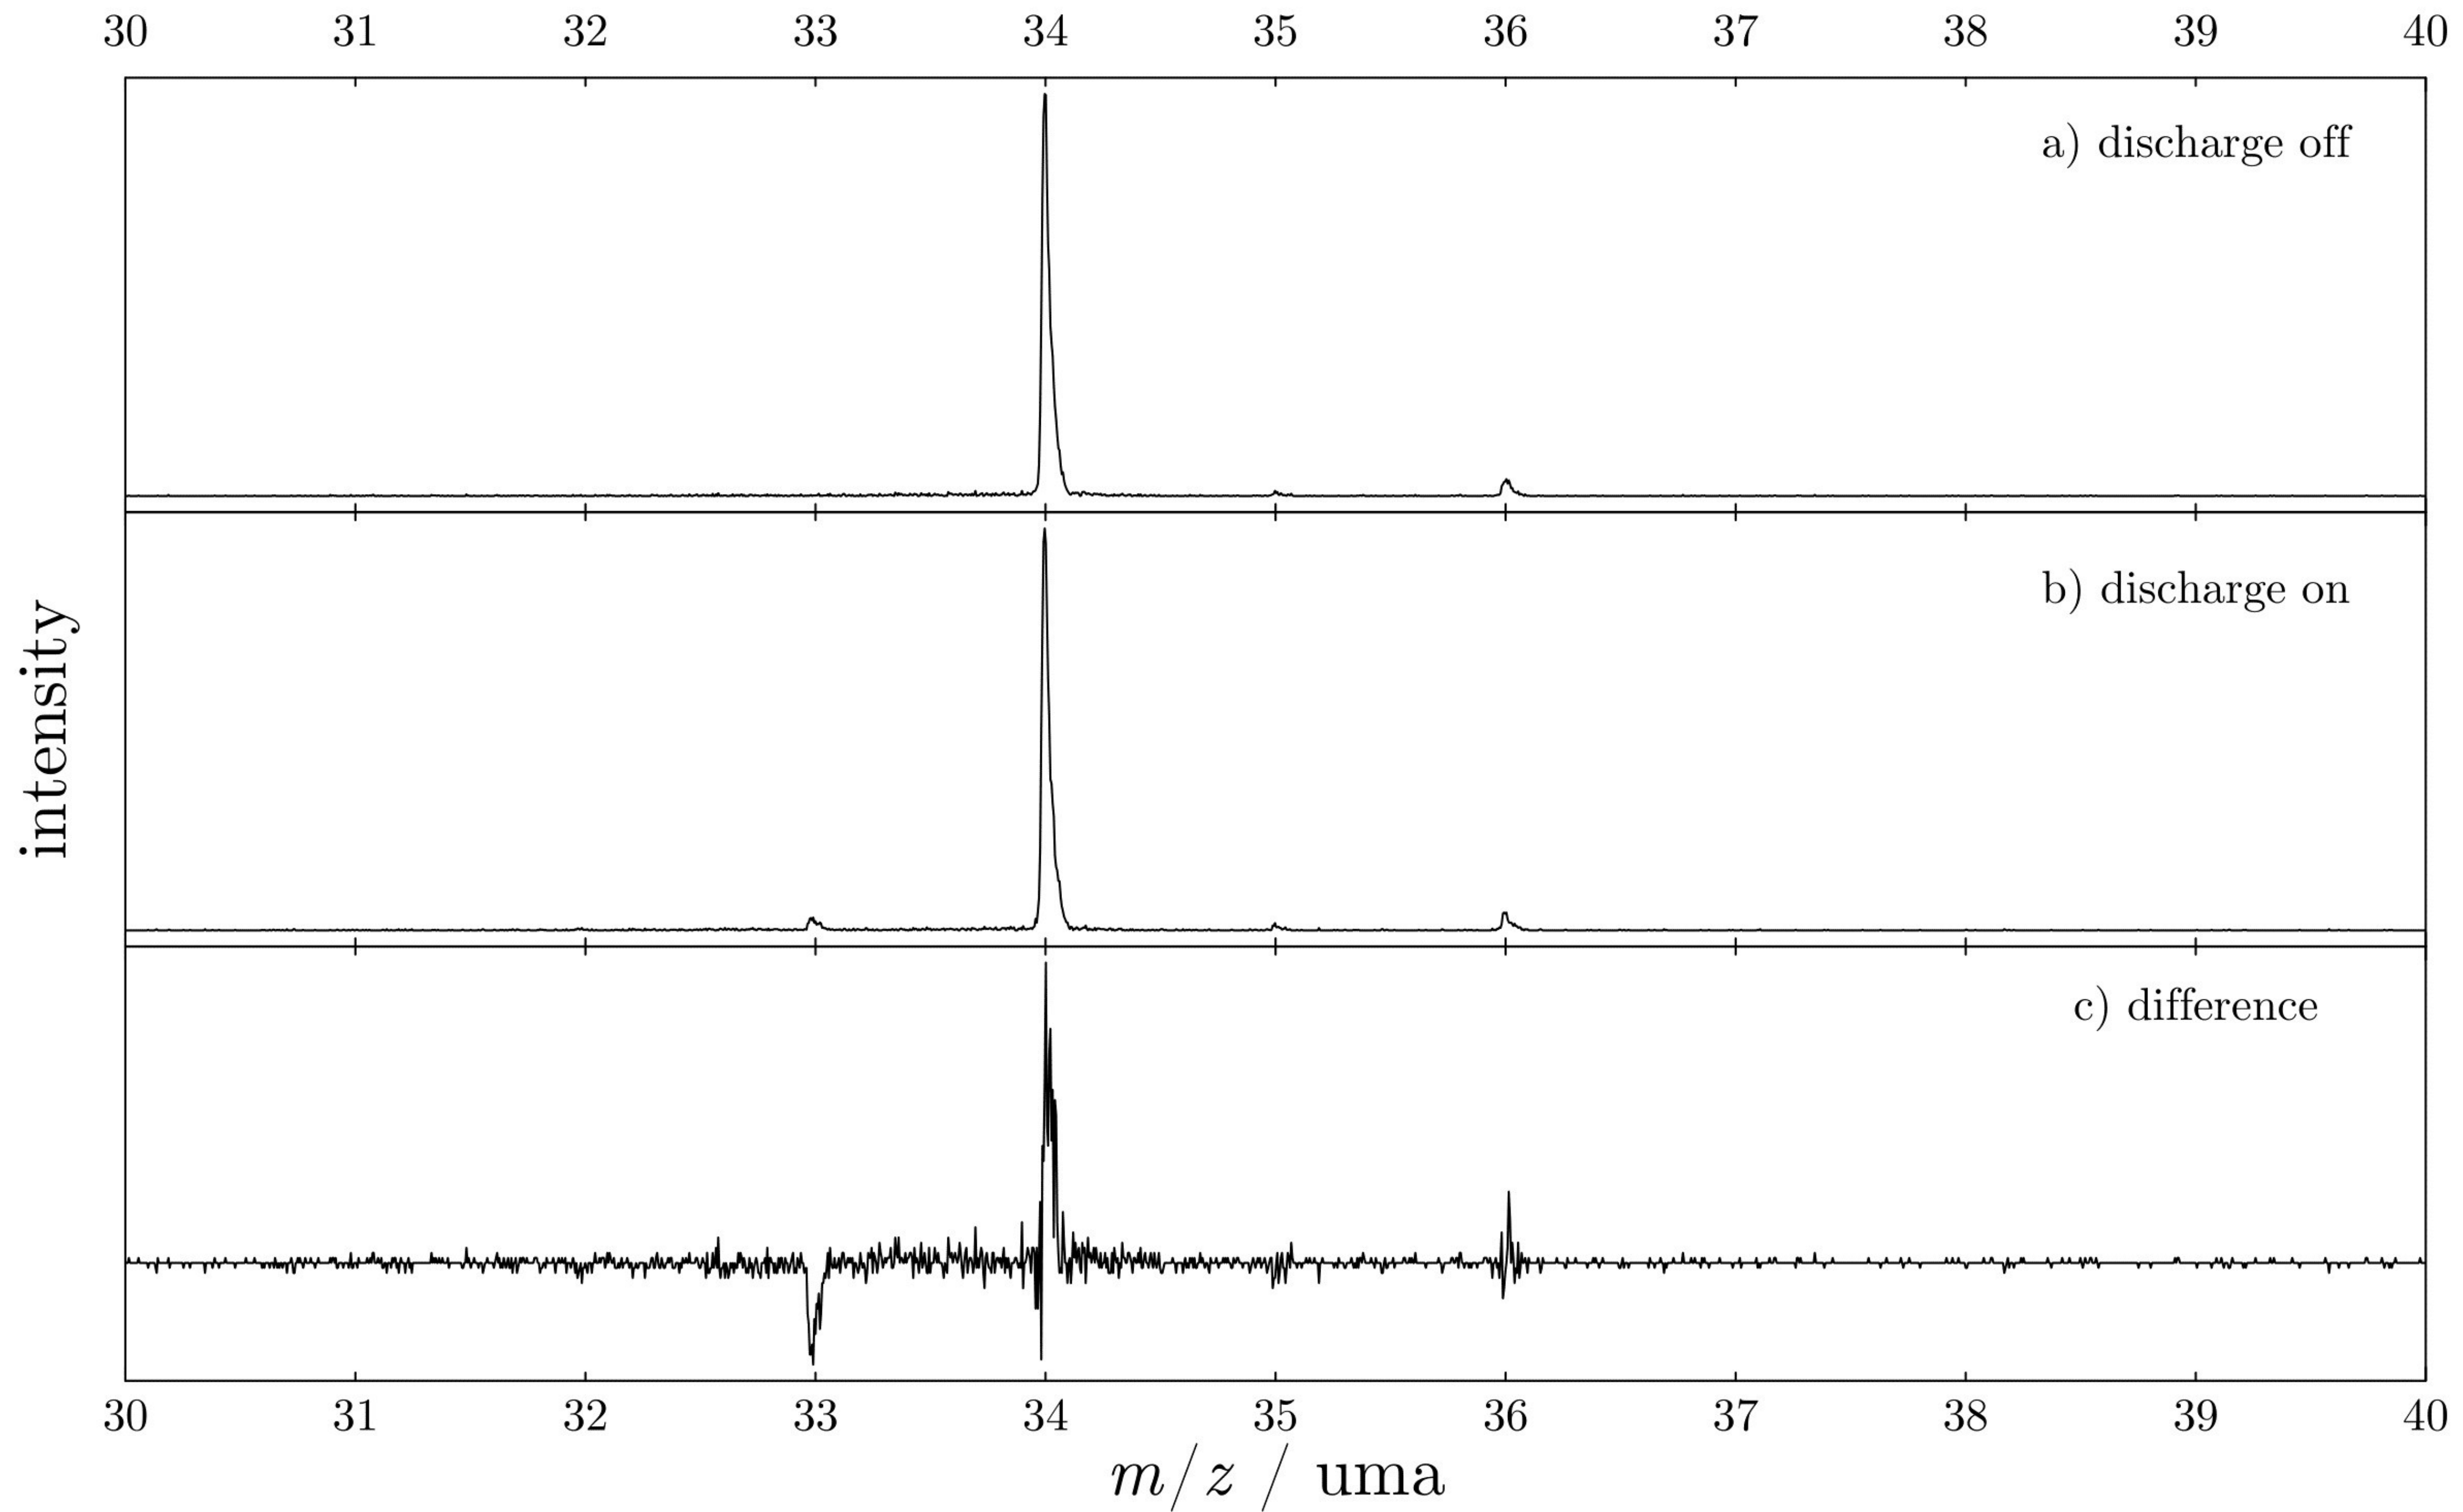

Supplement: c9cp05809e2.pdf [file c9cp05809e2.pdf]

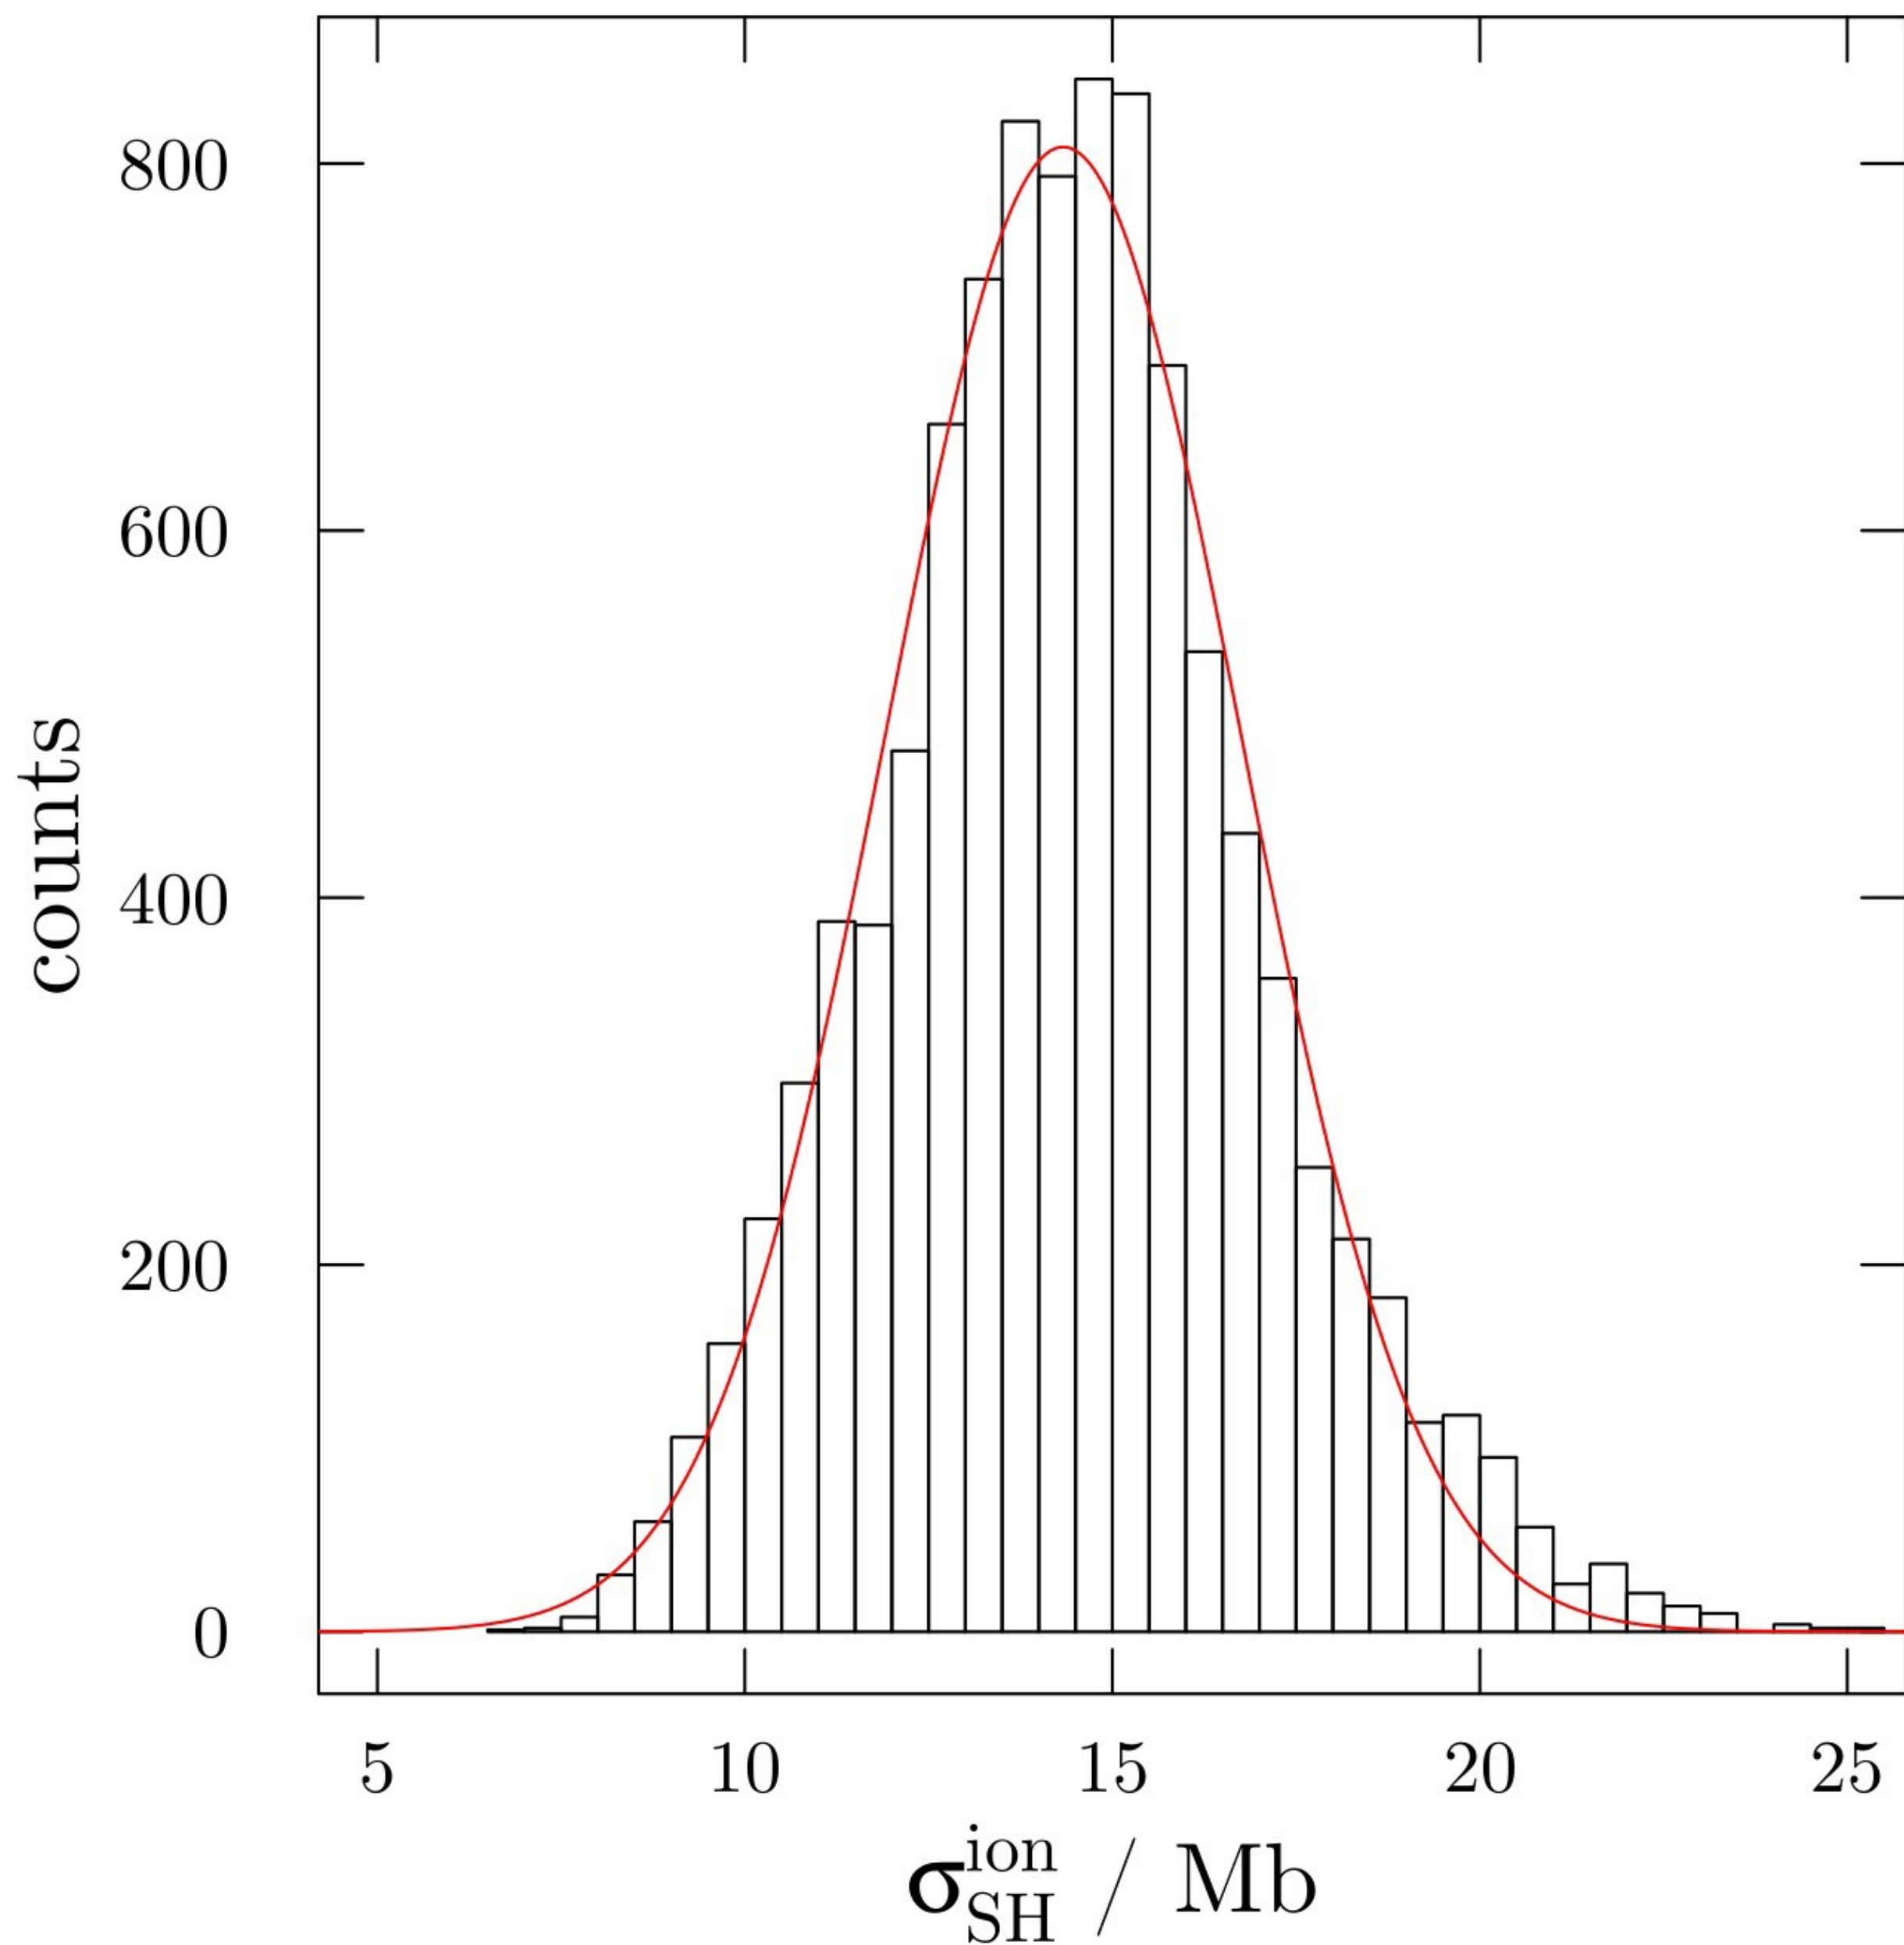

Supplement: c9cp05809e3.pdf [file c9cp05809e3.pdf]

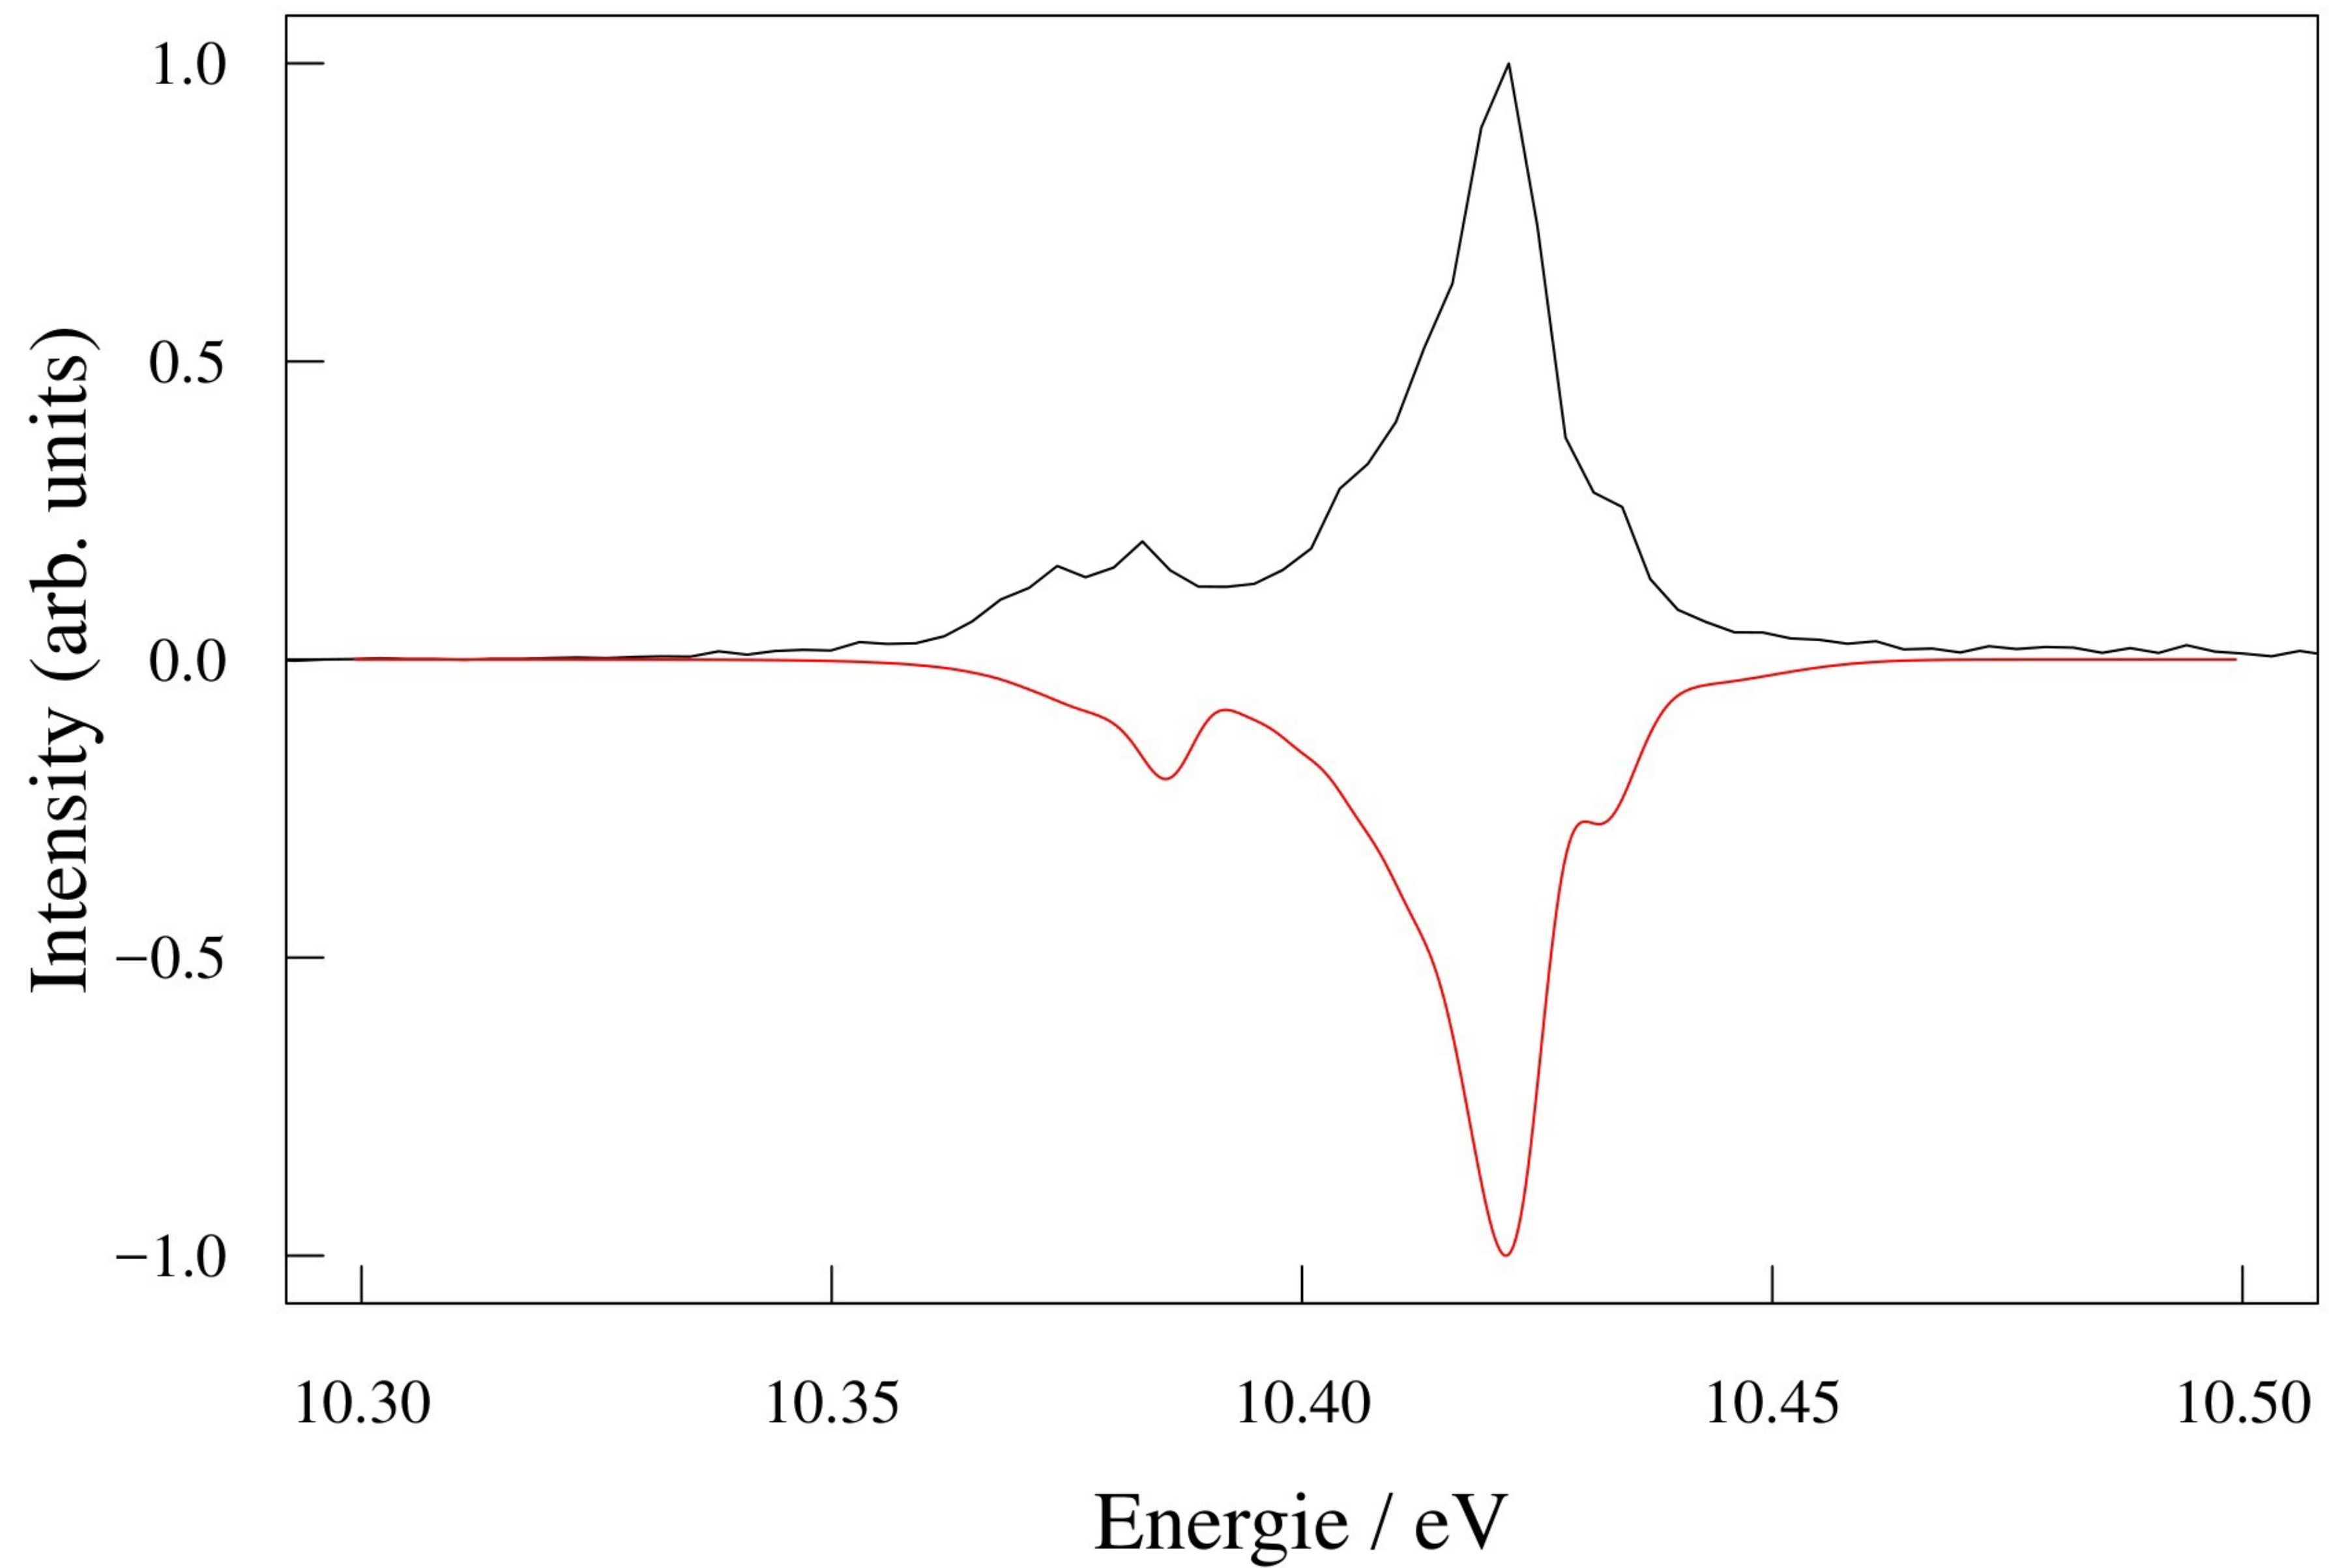

Supplement: c9cp05809e4.pdf [file c9cp05809e4.pdf]

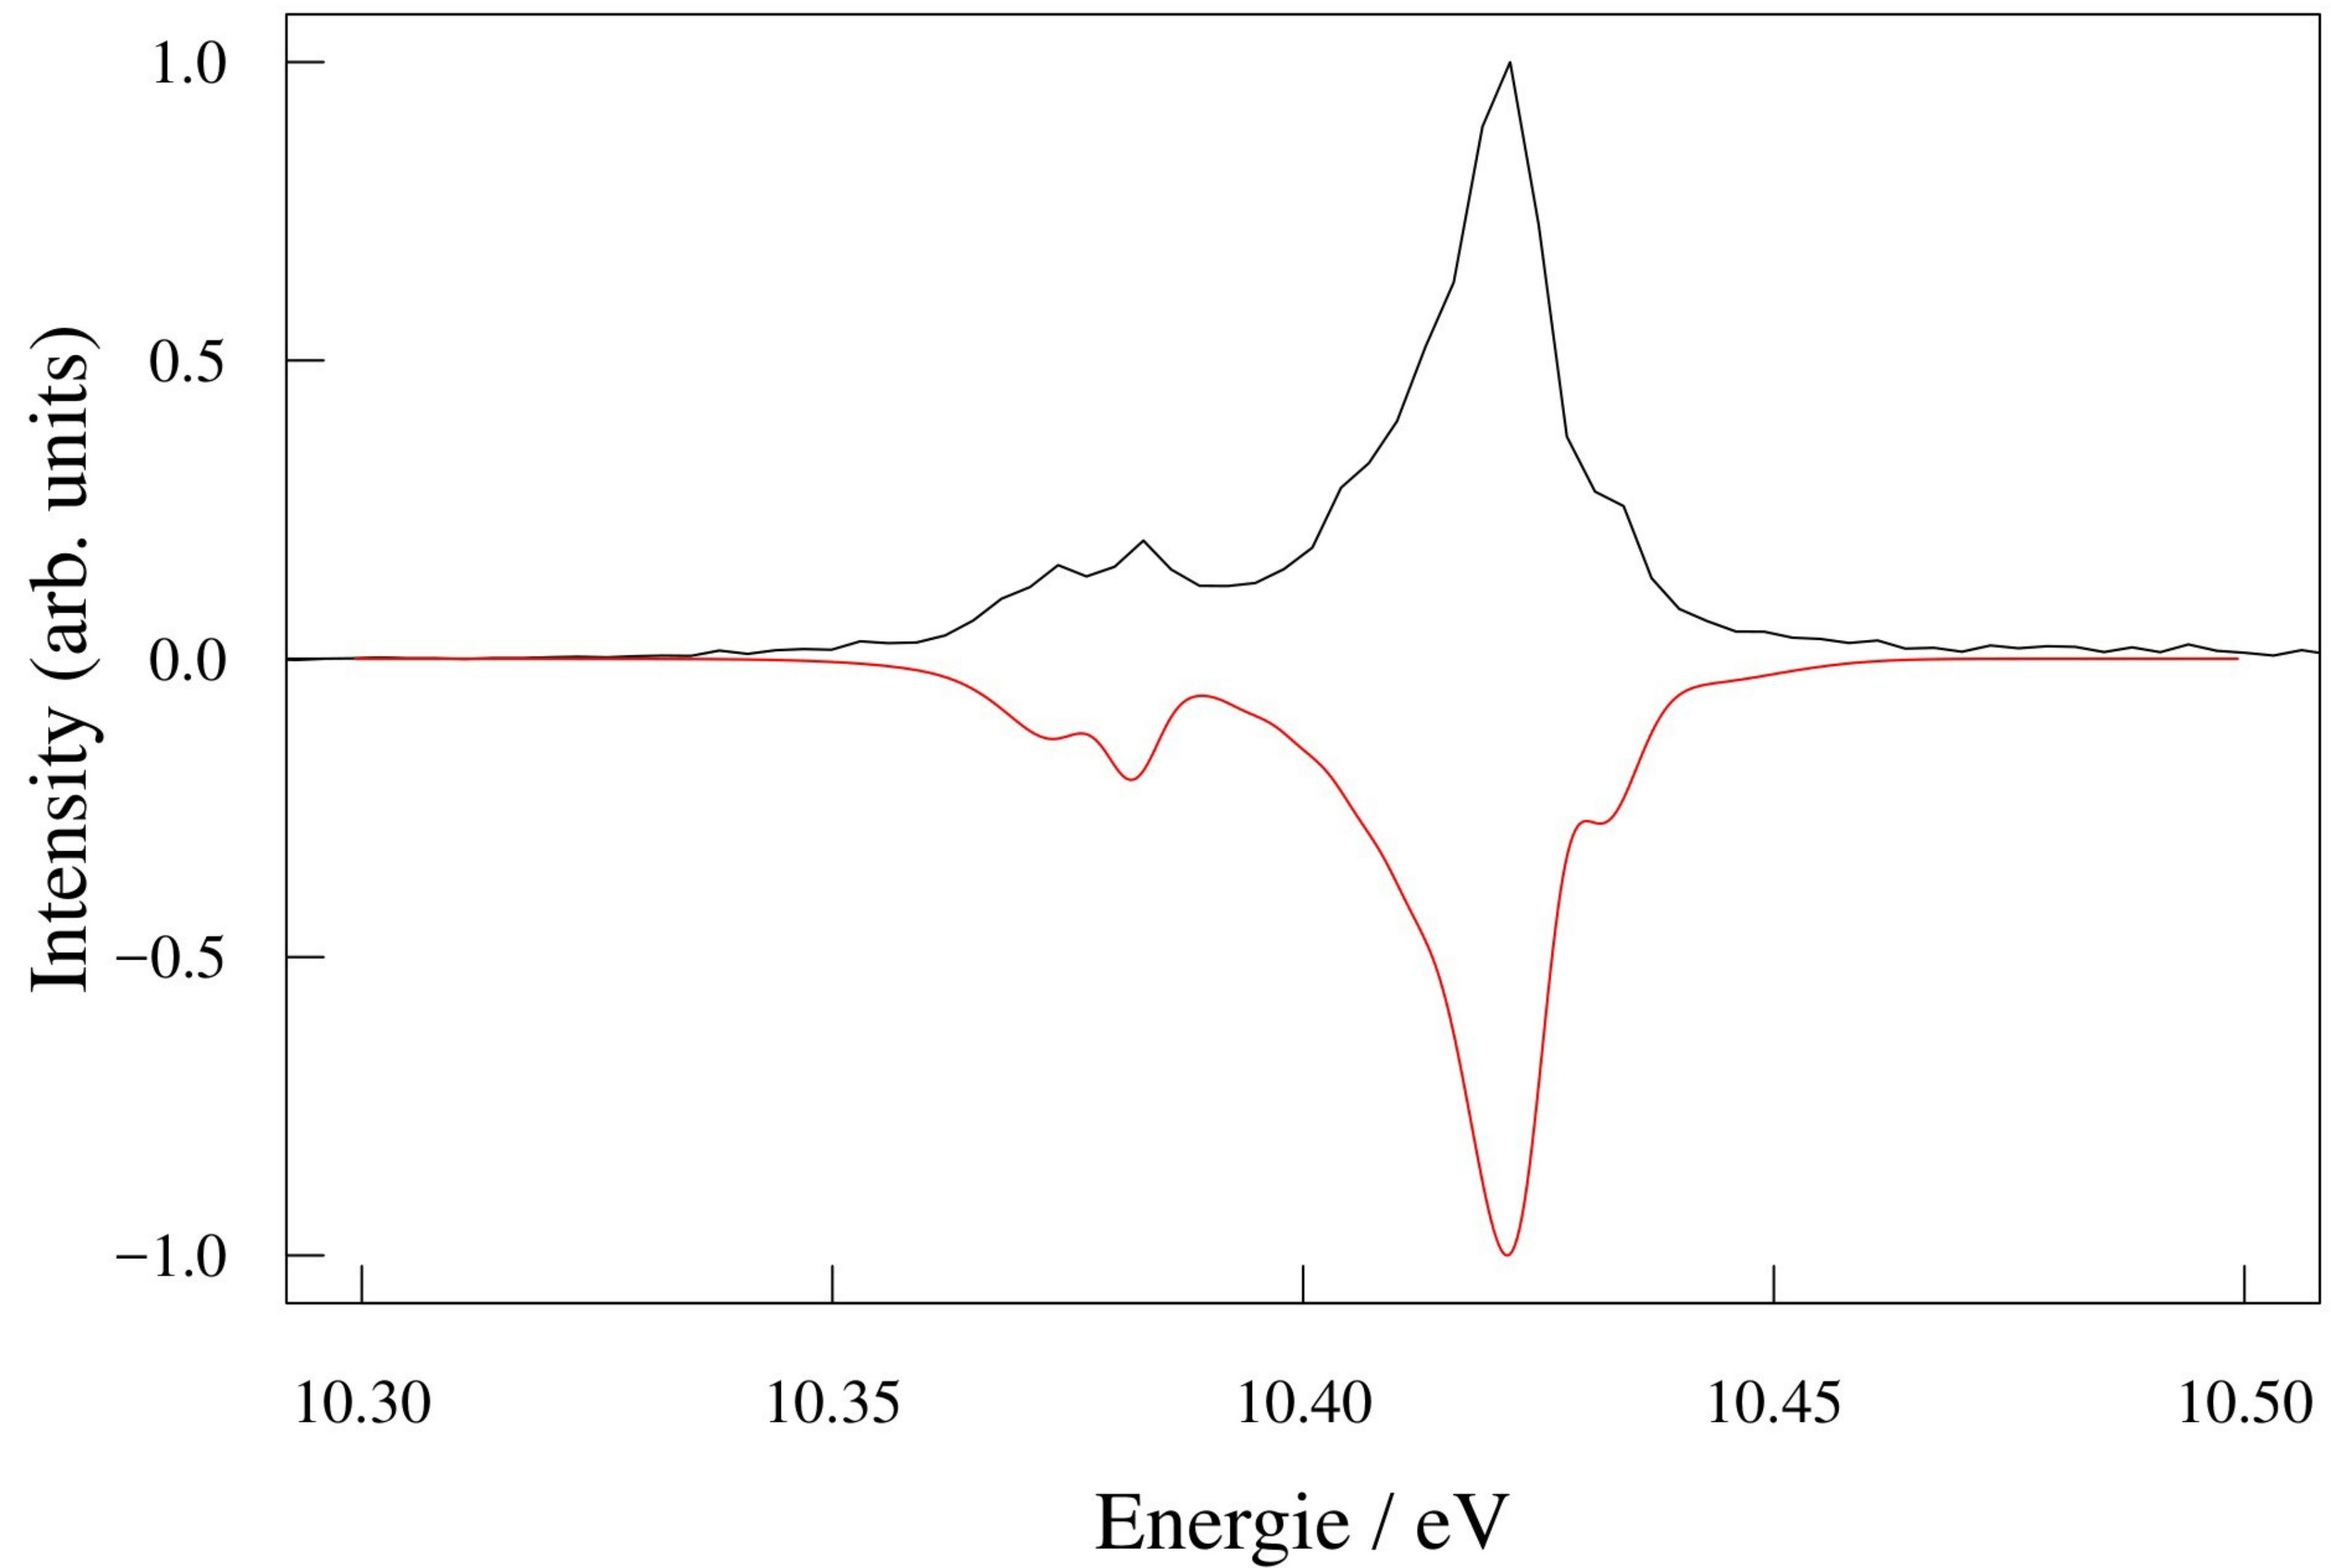

Supplement: c9cp05809e5.pdf [file c9cp05809e5.pdf]
